# Supplementary material
Source: PubMed Central journal article supplement (PMC7464686)
Supplement: NIHMS1064369-supplement-S1.pdf [file NIHMS1064369-supplement-S1.pdf]

## Supplementary Figures

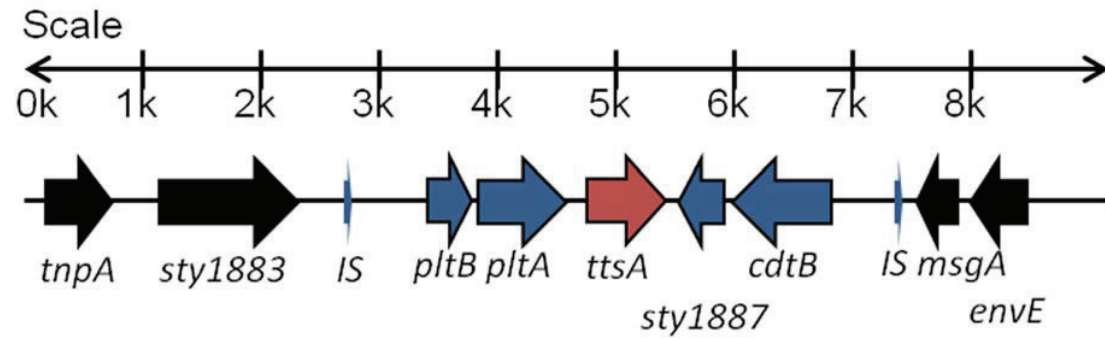

**Supplementary Fig. S1.** Diagram of the typhoid toxin locus in the *S. Typhi* chromosome. Expression of *pltB*, *pltA*, and *ttsA* is driven by a common promoter located upstream of *pltB*. It is unclear whether the open reading frame *sty1887* encodes a protein but its removal has no effect on typhoid toxin expression, secretion, or toxicity to cells after bacterial infection. No other gene elsewhere in the *S. Typhi* chromosome required for typhoid toxin secretion has been identified.
