# Supplementary material
Source: PubMed Central journal article supplement (PMC7464686)
Supplement: NIHMS1064369-supplement-S3.pdf [file NIHMS1064369-supplement-S3.pdf]

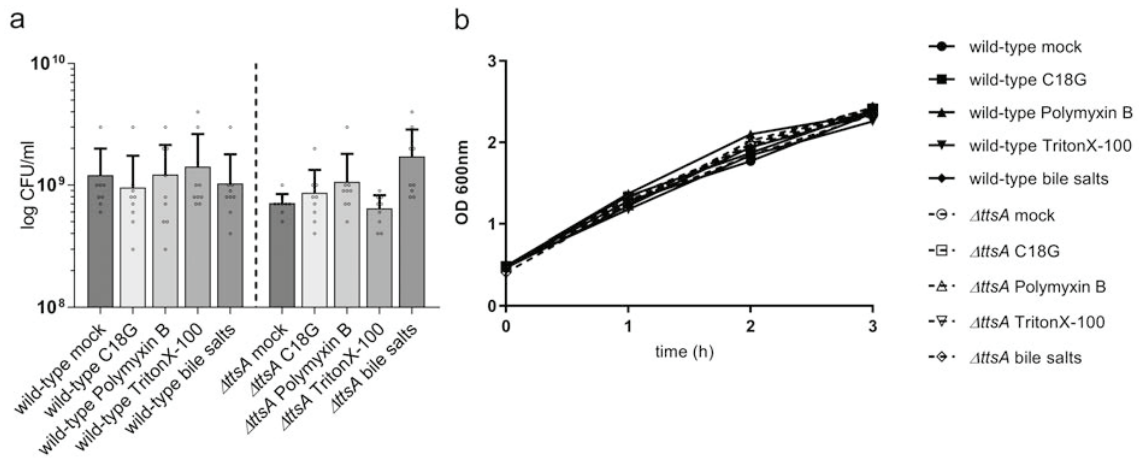

**Supplementary Fig. S3.** Effect of sub-inhibitory concentration of membrane-active compounds used to release typhoid toxin on *S. Typhi* viability. The antimicrobial peptides C18G (2.5  $\mu\text{g/ml}$ , 30 min), Polymyxin B (0.1  $\mu\text{g/ml}$ , 10 min), bile salts (0.05%, 15 min), or Triton X-100 (0.1 %, 15 min) were added for the indicated times, and colony forming units (CFUs) were determined by plating on solid media. Values represent the mean  $\pm$  standard deviation (**a**). Alternatively, bacteria were grown to an OD<sub>600</sub> of 0.5, at which point the indicated compounds were added at the concentrations indicated in (**a**), the cultures were further incubated for the indicated times, and bacterial growth was monitored by measuring their OD<sub>600</sub>. Values represent the mean  $\pm$  standard deviation (**b**). All data in (**a-c**) were derived from at least three independent experiments and three sample replicates.
