# Supplementary material
Source: PubMed Central journal article supplement (PMC7464686)
Supplement: NIHMS1064369-supplement-S4.pdf [file NIHMS1064369-supplement-S4.pdf]

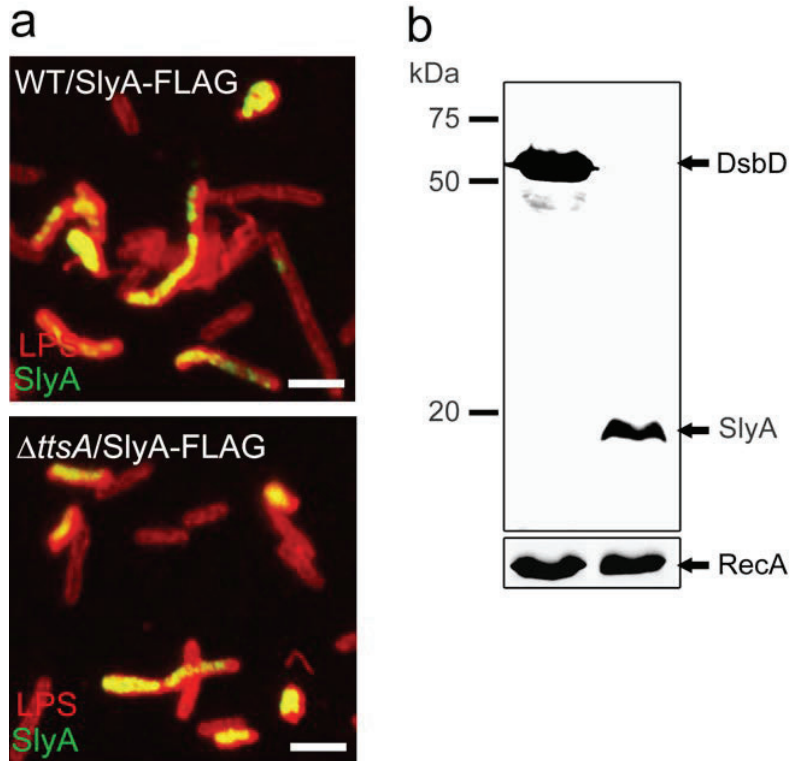

**Supplementary Fig. S4.** Detection of SlyA by immunofluorescence microscopy and Western blot analysis. (a) Wild type or  $\Delta$ ttsA *S. Typhi* strains expressing chromosomally-encoded FLAG-tagged SlyA were grown in TTIM for 24 hs. Bacteria were then fixed (4% PFA), treated with Lysozyme (200  $\mu$ g/ml in TE buffer) for 45 min at 37°C, and stained with a mouse monoclonal antibody directed to the FLAG tag (green) and a rabbit polyclonal antibody directed to *S. Typhi* LPS (red) (to visualize bacterial cells) (scale bar: 5  $\mu$ m). (b) Western blot analysis of SlyA and DsbD expression of *S. Typhi*, carrying chromosomally encoded FLAG-tagged SlyA or DsbD, grown for 24 hs in TTIM. The amount of RecA was used as a loading control, analyzed on a separate Western blot. All data were derived from at least three independent experiments.
