# Supplementary material
Source: PubMed Central journal article supplement (PMC7464686)
Supplement: NIHMS1064369-supplement-S5.pdf [file NIHMS1064369-supplement-S5.pdf]

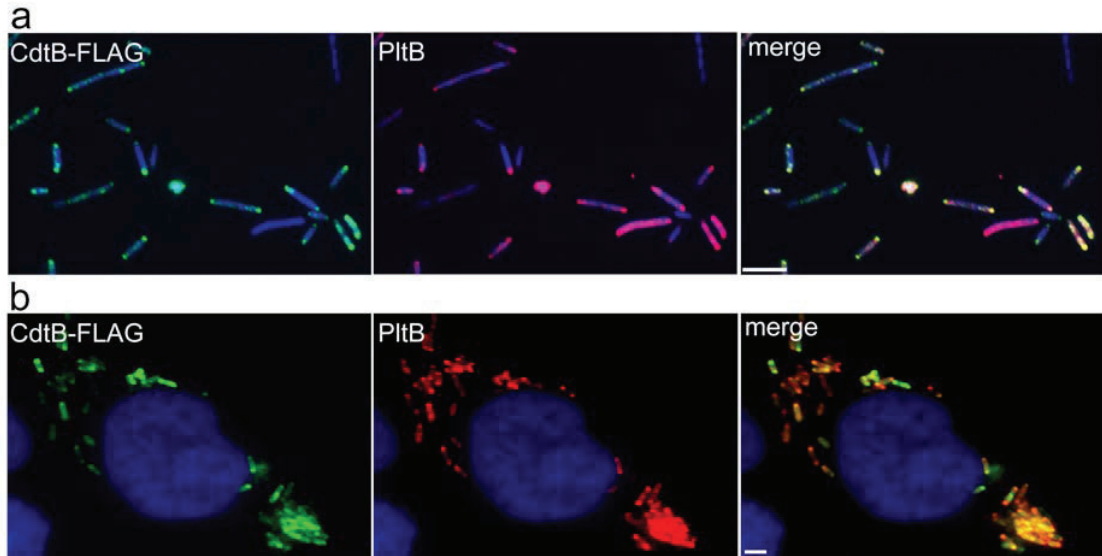

**Supplementary Fig. S5.** Subcellular co-localization of the typhoid toxin components PltB and CdtB. *S. Typhi*, with chromosomally encoded Flag-tagged CdtB was grown for 24 hours in TTIM, fixed, treated with Triton X-100 (0.3 %) and stained with a mouse antibody directed to the FLAG-epitope (to visualize CdtB) (green) and a rabbit polyclonal antibody specifically directed to PltB (red) (a). Alternative, the same strain was grown in LB broth, applied to cultured Henle-407 human epithelial cells, and 24 hs after infection, infected cells were stained with an antibody directed to the Flag-epitope (green) to visualize CdtB, a rabbit polyclonal antibody directed specifically to *S. Typhi* PltB (red) and DAPI for DNA detection (blue) (scale bar: 5  $\mu$ m) (b). All images were derived from at least three independent experiments.
