# Supplementary material
Source: PubMed Central journal article supplement (PMC7464686)
Supplement: NIHMS1064369-supplement-S6.pdf [file NIHMS1064369-supplement-S6.pdf]

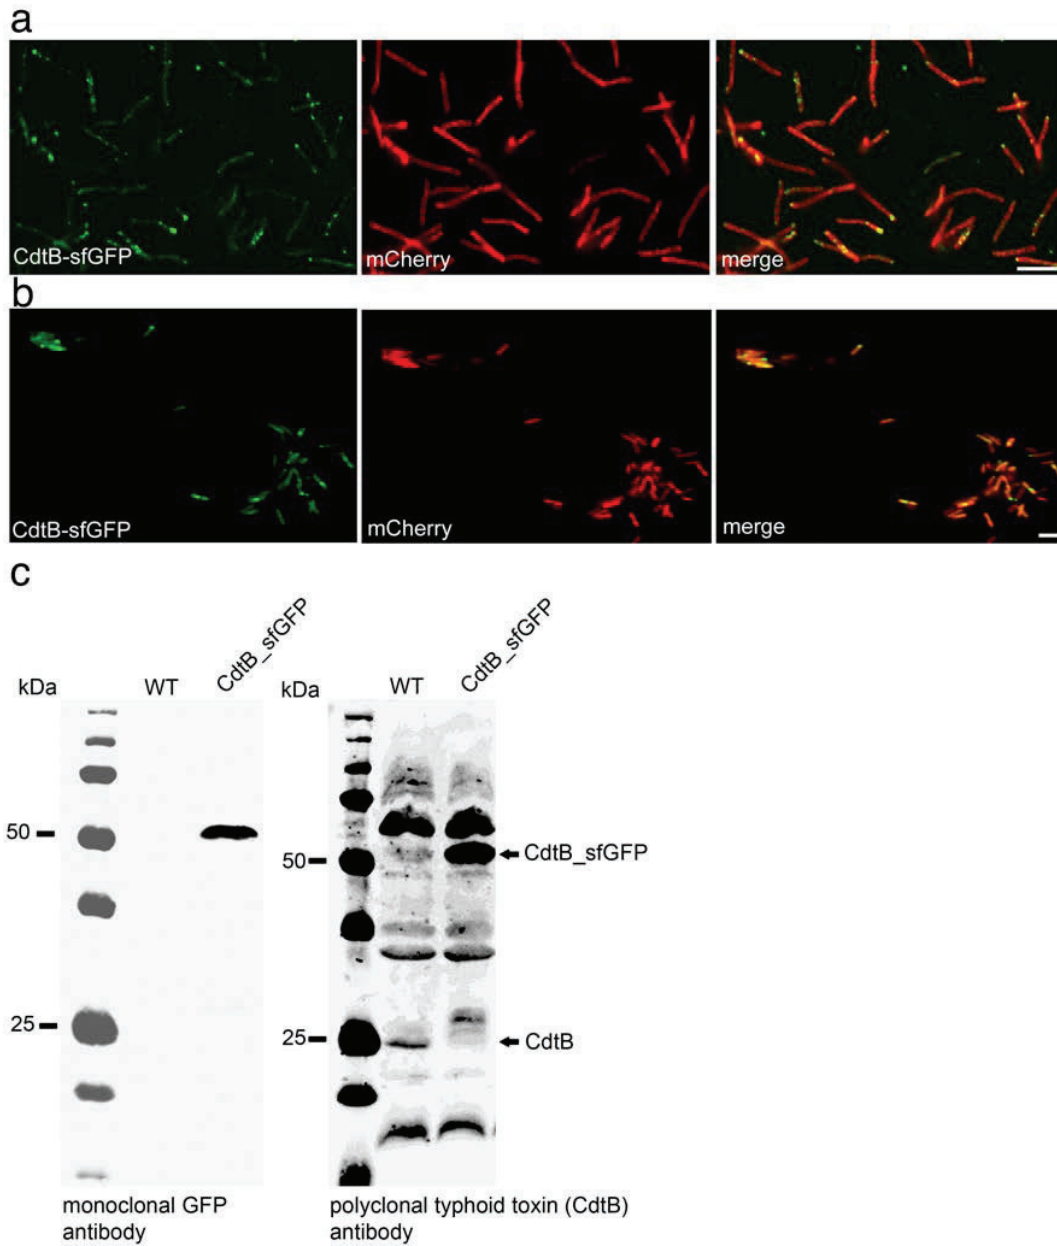

**Supplementary Fig. S6.** Subcellular localization of CdtB in live bacteria. *S. Typhi* with chromosomally encoded CdtB-sfGFP (green) and carrying a plasmid constitutively expressing the fluorescent protein mcherry (red) was grown for 24 hs in TTIM, attached to polylysine coated coverslips and directly observed under the microscope (**a**) (scale bar: 5  $\mu$ m). Alternative, the same strain was grown in LB broth, applied to cultured Henle-407 human epithelial cells, and 24 hours after infection, infected cells were directly observed under the microscope (**b**) (scale bar: 5  $\mu$ m). Western blot analyses of CdtB-sfGFP expression levels and fusion protein stabilities using antibodies directed to GFP and CdtB, as indicated (**c**). These experiments were repeated at least three times.
