# Supplementary material
Source: PubMed Central journal article supplement (PMC7464686)
Supplement: NIHMS1064369-supplement-S7.pdf [file NIHMS1064369-supplement-S7.pdf]

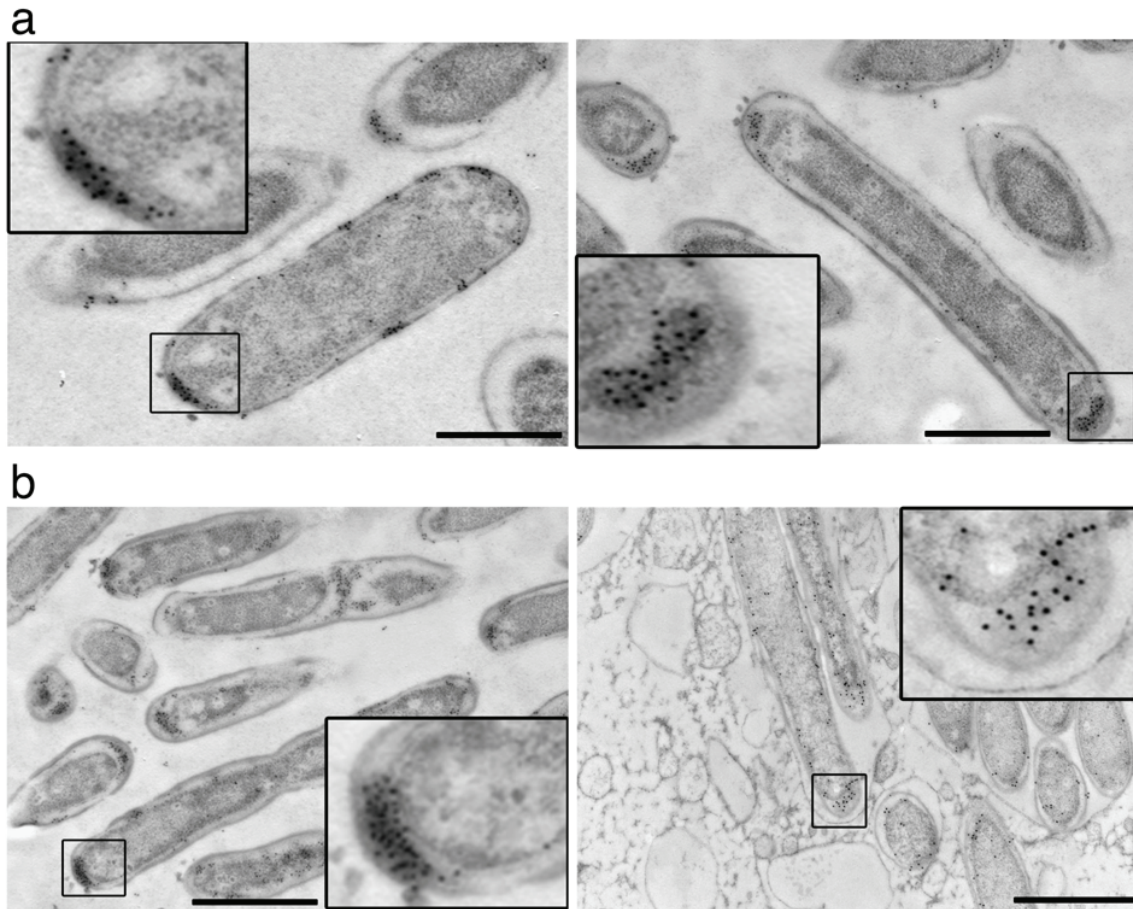

**Supplementary Fig. S7.** Immunoelectron microscopy analysis of typhoid toxin localization within bacterial cells. *S. Typhi* carrying chromosomally encoded FLAG-tagged CdtB was grown in TTIM for 24 hs, bacteria were fixed and processed for electron microscopy (a). Alternatively, the same strain was grown in LB broth and applied to cultured Henle-407 human epithelial cells and 24 hs after infection, the infected cells were processed for electron microscopy observation (b). The location of typhoid toxin within bacterial cells in frozen thin-sections of the different samples was probed with a gold-labeled anti FLAG antibody (scale bar: 1 μm). These experiments were repeated at least three times.
