# Supplementary material
Source: PubMed Central journal article supplement (PMC7464686)
Supplement: NIHMS1064369-supplement-S9.pdf [file NIHMS1064369-supplement-S9.pdf]

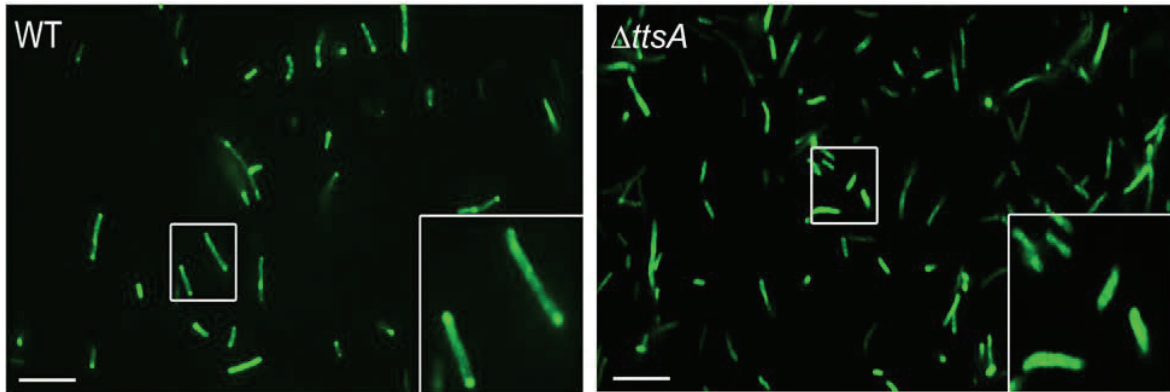

**Supplementary Fig. S9.** TtsA-dependent polar remodeling of the petidoglycan layer. *S. Typhi* wild-type and the isogenic  $\Delta ttsA$  mutant were grown in TTIM for 24 hs, and metabolically labeled by the addition of alkyne-D-alanine (2mM) for 240 minutes. Bacteria were then fixed and subsequently treated with an azido-AF488 fluorophore (10 $\mu$ M), which was then covalently linked by click chemistry to alkyne-D-alanine that had been incorporated into to the PG layer (scale bar: 5  $\mu$ m) (Quantification of this experiment is shown in Fig. 4a). These experiments were repeated at least three times.
