# Supplementary material
Source: PubMed Central journal article supplement (PMC7464686)
Supplement: NIHMS1064369-supplement-S10.pdf [file NIHMS1064369-supplement-S10.pdf]

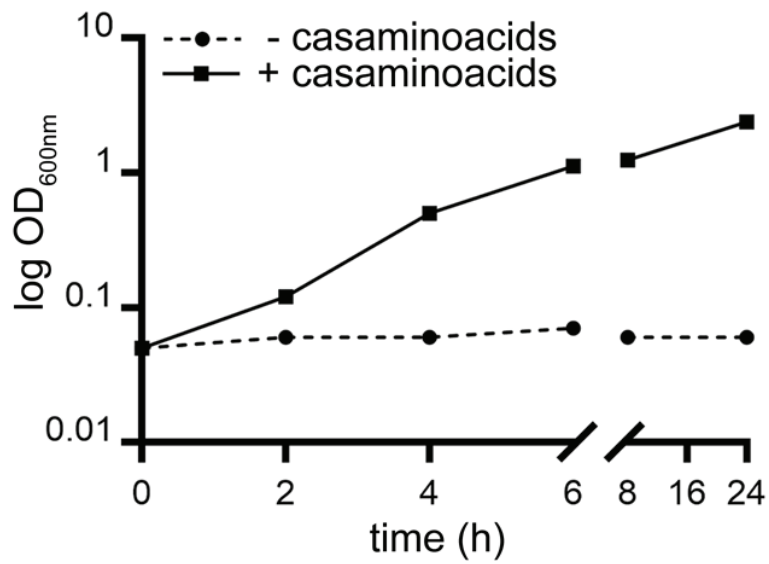

**Supplementary Fig. S10.** Growth of wild type *S. Typhi* after addition of casaminoacids. *S. Typhi* was grown for 24 hs in TTIM, and subsequently transferred to TTIM or to TTIM containing casaminoacids (1 %), which allows bacteria to re-enter the cell cycle. At the indicated time-points bacterial growth was monitored by measuring the OD<sub>600</sub>. This experiment was repeated at least three times with equivalent results.
