# Supplementary material
Source: PubMed Central journal article supplement (PMC7464686)
Supplement: NIHMS1064369-supplement-S11.pdf [file NIHMS1064369-supplement-S11.pdf]

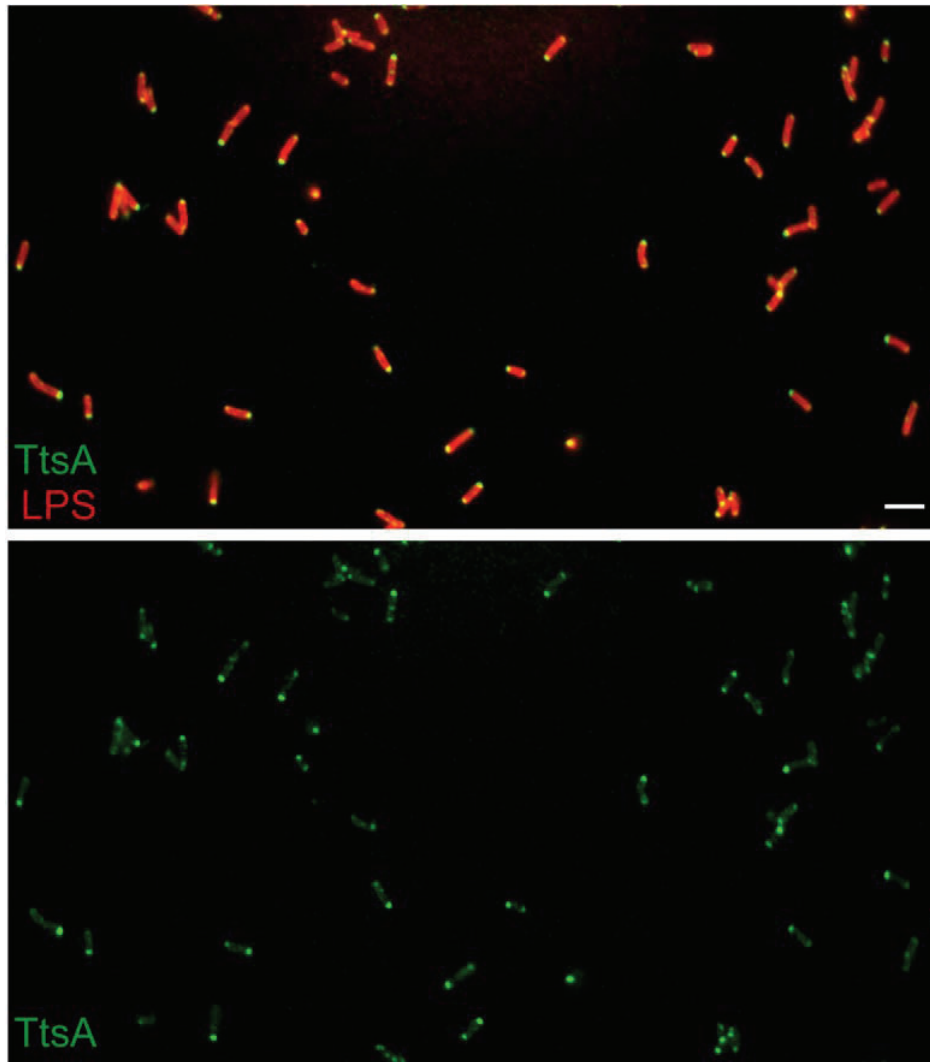

**Supplementary Fig. S11.** Detection of TtsA at the bacterial poles after re-growth of *S. Typhi* in casaminoacid-supplemented TTIM. Wild-type *S. Typhi* carrying chromosomally encoded FLAG-tagged TtsA was grown for 24 hs in TTIM to stationary phase. Bacteria were then transferred to TTIM containing casaminoacids (1 %), which allows bacteria to re-enter the cell cycle, and 6 hs after, bacteria were fixed, treated with lysozyme (50  $\mu\text{g}/\text{ml}$ ) and Triton X-100 (0.3 %). TtsA was visualized by fluorescence microscopy using a monoclonal antibody directed to the FLAG-epitope and a rabbit antibody directed to *S. Typhi* LPS (red) (to visualize bacterial cells). (scale bar: 5  $\mu\text{m}$ ) (Quantification of this experiment is shown in Fig. 4C). This experiment was repeated three times.
