# Supplementary material
Source: PubMed Central journal article supplement (PMC7464686)
Supplement: NIHMS1064369-supplement-S12.pdf [file NIHMS1064369-supplement-S12.pdf]

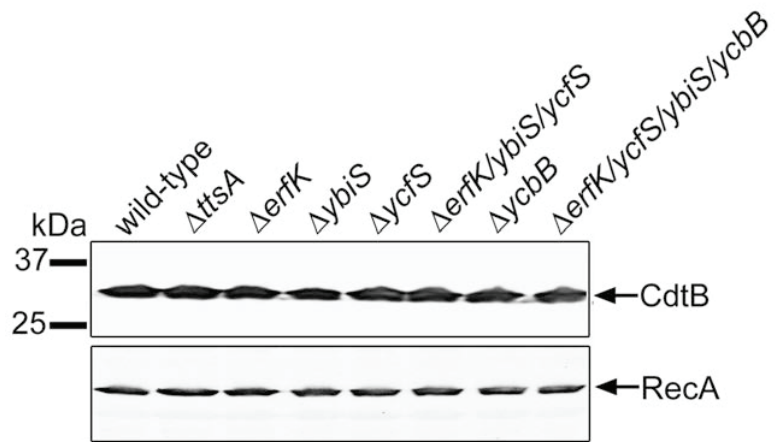

**Supplementary Fig. S12.** Western blot analysis of the expression levels of CdtB in the indicated LD-transpeptidase *S. Typhi* mutant strains assayed in Figure 5 **a-d**. The amount of RecA was used as a loading control, analyzed on a separate Western blot. This experiment was repeated three times.
