# Supplementary material
Source: PubMed Central journal article supplement (PMC7464686)
Supplement: NIHMS1064369-supplement-S14.pdf [file NIHMS1064369-supplement-S14.pdf]

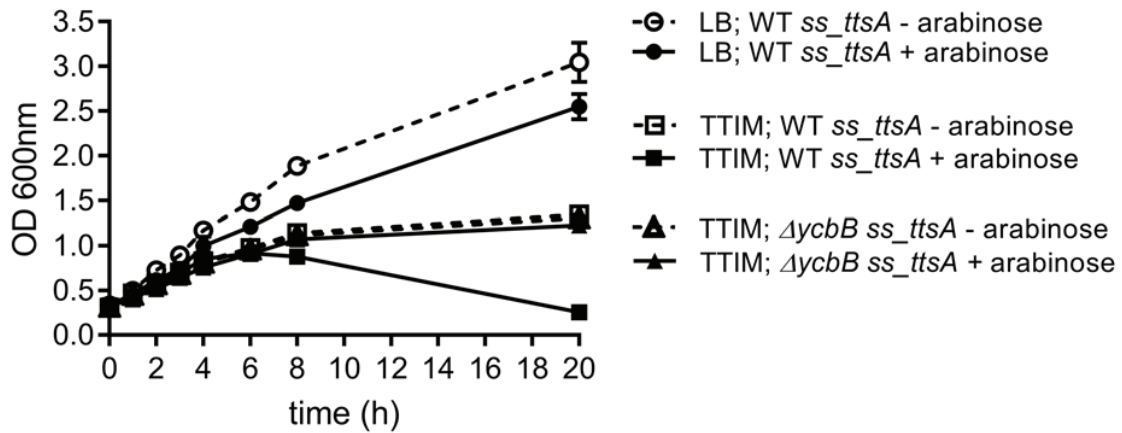

**Supplementary Fig. S14.** Growth of *S. Typhi* wild-type and  $\Delta ycbB$  mutant strain, expressing TtsA containing a N-terminal Sec translocation signal sequence from DsbA. Overnight grown bacteria were sub-cultured (1:50) in TTIM or LB and grown to an OD<sub>600</sub> of 0.3, at which point 0.001 % arabinose was added to the bacterial cultures to induce TtsA expression. Values represent mean +/- standard deviation of three independent experiments, and three sample replicates.
