# Supplementary material
Source: PubMed Central journal article supplement (PMC7464686)
Supplement: NIHMS1064369-supplement-Table_S1.pdf [file NIHMS1064369-supplement-Table_S1.pdf]

Table S1: Muropeptides identified through high-performance liquid chromatography analysis

| Muropeptide <sup>1</sup><br>or feature | Relative peak area (%) <sup>2</sup> |               |               | Retention<br>time (min) |
|----------------------------------------|-------------------------------------|---------------|---------------|-------------------------|
|                                        | WT                                  | $\Delta ttsA$ | $\Delta ycbB$ |                         |
| Tri                                    | 11.9                                | 11.6          | 6.6           | 20.8                    |
| Tetra                                  | 32.9                                | 32.9          | 44.4          | 32.6                    |
| Di                                     | 2.5                                 | 2.5           | 2.1           | 37.0                    |
| TriTri(DAP)                            | 2.4                                 | 2.4           | 0.4           | 56.9                    |
| TetraTri(DAP)                          | 6.0                                 | 6.1           | 1.0           | 62.0                    |
| TetraTri                               | 7.7                                 | 7.1           | 2.8           | 63.6                    |
| TetraTetra                             | 32.9                                | 33.6          | 38.6          | 69.6                    |
| TetraTetraTetra                        | 3.6                                 | 3.7           | 4.1           | 85.1                    |
| % dipeptides                           | 2.5                                 | 2.5           | 2.1           |                         |
| % tripeptides                          | 21.2                                | 20.6          | 8.9           |                         |
| % tetrapeptides                        | 76.3                                | 76.9          | 89.0          |                         |
| % DD-cross-links <sup>3</sup>          | 85.0                                | 85.0          | 97.3          |                         |
| % LD-cross-links <sup>3</sup>          | 15.0                                | 15.0          | 2.7           |                         |

<sup>1</sup> Muropeptides were identified by their retention time

<sup>2</sup> Values were calculated from known muropeptides.

<sup>3</sup> Calculated from cross-linked muropeptides only.
