# Supplementary material
Source: PubMed Central journal article supplement (PMC7464686)
Supplement: NIHMS1064369-supplement-Table_S2.pdf [file NIHMS1064369-supplement-Table_S2.pdf]

Table S2: Strains and Plasmids

| Strains         | Description                                                                                                                   | Reference  |
|-----------------|-------------------------------------------------------------------------------------------------------------------------------|------------|
| SB2201          | <i>S. Typhi</i> WT ISP2825 reference strain                                                                                   | (1)        |
| SB1946          | <i>S. Typhi</i> <i>cdtB</i> <sup>3xFlag</sup>                                                                                 | (2)        |
| SB1949          | <i>S. Typhi</i> $\Delta$ <i>ttsA</i> <i>cdtB</i> <sup>3xFlag</sup>                                                            | (3)        |
| SB3291          | <i>S. Typhi</i> <i>cdtB</i> <sup>sfGFP</sup>                                                                                  | This study |
| SB1844          | <i>S. Typhi</i> $\Delta$ <i>ttsA</i>                                                                                          | (3)        |
| SB3245          | <i>S. Typhi</i> <i>ttsA</i> <sup>3xFlag</sup>                                                                                 | This study |
| SB3296          | <i>S. Typhi</i> <i>dsbD</i> <sup>3xFlag</sup>                                                                                 | This study |
| SB3204          | <i>S. Typhi</i> <i>slyA</i> <sup>3xFlag</sup>                                                                                 | This study |
| SB3612          | <i>S. Typhi</i> <i>ycbB</i> <sup>3xFlag</sup>                                                                                 | This study |
| SB3308          | <i>S. Typhi</i> $\Delta$ <i>ycbB</i> <i>cdtB</i> <sup>3xFlag</sup>                                                            | This study |
| SB3304          | <i>S. Typhi</i> $\Delta$ <i>erfK</i> <i>cdtB</i> <sup>3xFlag</sup>                                                            | This study |
| SB3306          | <i>S. Typhi</i> $\Delta$ <i>ycfS</i> <i>cdtB</i> <sup>3xFlag</sup>                                                            | This study |
| SB3302          | <i>S. Typhi</i> $\Delta$ <i>ybiS</i> <i>cdtB</i> <sup>3xFlag</sup>                                                            | This study |
| SB3601          | <i>S. Typhi</i> $\Delta$ <i>erfK/ycfS</i> <i>cdtB</i> <sup>3xFlag</sup>                                                       | This study |
| SB3605          | <i>S. Typhi</i> $\Delta$ <i>erfK/ycfS/ybiS</i> <i>cdtB</i> <sup>3xFlag</sup>                                                  | This study |
| SB3606          | <i>S. Typhi</i> $\Delta$ <i>erfK/ycfS/ybiS/ycbB</i> <i>cdtB</i> <sup>3xFlag</sup>                                             | This study |
| BL21 (DE3)      | <i>E. coli</i> protein expression strain                                                                                      | Invitrogen |
| $\beta$ -2163   | <i>E. coli</i> $\Delta$ <i>nic</i> 35                                                                                         | (4)        |
| <b>Plasmids</b> |                                                                                                                               |            |
| pSB890          | R6K origin, counter selectable with sucrose, mutagenesis plasmid                                                              | (6)        |
| pET28b          | protein expression vector                                                                                                     | Invitrogen |
| pSB5448         | pSB890 <i>ttsA</i> <sup>3xflag</sup> to replace <i>ttsA</i> in the chromosome                                                 | This study |
| pSB5427         | pSB890 <i>dsbD</i> <sup>3xFlag</sup> to replace <i>dsbD</i> in the chromosome                                                 | This study |
| pSB5097         | pSB890 <i>slyA</i> <sup>3xFlag</sup> to replace <i>slyA</i> in the chromosome                                                 | This study |
| pSB5472         | pSB890 <i>cdtB</i> <sup>sfGFP</sup> to replace <i>cdtB</i> in the chromosome                                                  | This study |
| pSB5903         | pSB890 <i>ycbB</i> <sup>3xFlag</sup> to replace <i>ycbB</i> in the chromosome                                                 | This study |
| pSB4004         | mcherry ( <i>rpsM</i> promoter) expressing plasmid, based on low copy pWSK129 plasmid                                         | (7)        |
| pSB3783         | pBAD24 plasmid with a tetracycline resistance cassette. Plasmid was used for trans complementation and overexpression studies | This study |
| pSB5904         | pSB3783 <i>ycbB</i>                                                                                                           | This study |
| pSB5905         | pSB3783 <i>ycbB</i> <sup>C528A</sup>                                                                                          | This study |
| pSB5906         | pSB3783 <i>ttsA</i>                                                                                                           | This study |
| pSB5907         | pSB3783 <i>ss(dsba)</i> <i>ttsA</i>                                                                                           | This study |
| pSB5908         | pSB3783 <i>ss(malE)</i> <i>ttsA</i>                                                                                           | This study |
| pSB5485         | pET28b <i>ttsA</i> -N term. histidin tag                                                                                      | This study |
| pSB5901         | pET28b <i>ttsA</i> <sup>E14A</sup> -N term. histidin tag                                                                      | This study |

1. J. E. Galan, R. Curtiss, 3rd, Distribution of the *invA*, -B, -C, and -D genes of *Salmonella typhimurium* among other *Salmonella* serovars: *invA* mutants of *Salmonella typhi* are deficient for entry into mammalian cells. *Infection and immunity* **59**, 2901-2908 (1991); published online EpubSep (
2. S. Spano, J. E. Ugalde, J. E. Galan, Delivery of a *Salmonella Typhi* exotoxin from a host intracellular compartment. *Cell Host Microbe* **3**, 30-38 (2008); published online EpubJan 17 (10.1016/j.chom.2007.11.001).
3. H. Hodak, J. E. Galan, A *Salmonella Typhi* homologue of bacteriophage muramidases controls typhoid toxin secretion. *EMBO Rep* **14**, 95-102 (2013); published online EpubJan (10.1038/embor.2012.186).
4. G. Demarre, A. M. Guerout, C. Matsumoto-Mashimo, D. A. Rowe-Magnus, P. Marliere, D. Mazel, A new family of mobilizable suicide plasmids based on broad host range R388 plasmid (*IncW*) and RP4 plasmid (*IncPalpha*) conjugative machineries and their cognate *Escherichia coli* host strains. *Research in microbiology* **156**, 245-255 (2005); published online EpubMar (10.1016/j.resmic.2004.09.007).
5. M. Lara-Tejero, J. E. Galan, *Salmonella enterica* serovar *typhimurium* pathogenicity island 1-encoded type III secretion system translocases mediate intimate attachment to nonphagocytic cells. *Infection and immunity* **77**, 2635-2642 (2009); published online EpubJul (10.1128/IAI.00077-09).
6. K. Kaniga, J. C. Bossio, J. E. Galan, The *Salmonella typhimurium* invasion genes *invF* and *invG* encode homologues of the AraC and PulD family of proteins. *Molecular microbiology* **13**, 555-568 (1994); published online EpubAug (
7. S. Spano, X. Liu, J. E. Galan, Proteolytic targeting of Rab29 by an effector protein distinguishes the intracellular compartments of human-adapted and broad-host *Salmonella*. *Proceedings of the National Academy of Sciences of the United States of America* **108**, 18418-18423 (2011); published online EpubNov 8 (10.1073/pnas.1111959108).
