# Supplementary material
Source: PubMed Central journal article supplement (PMC7464686)

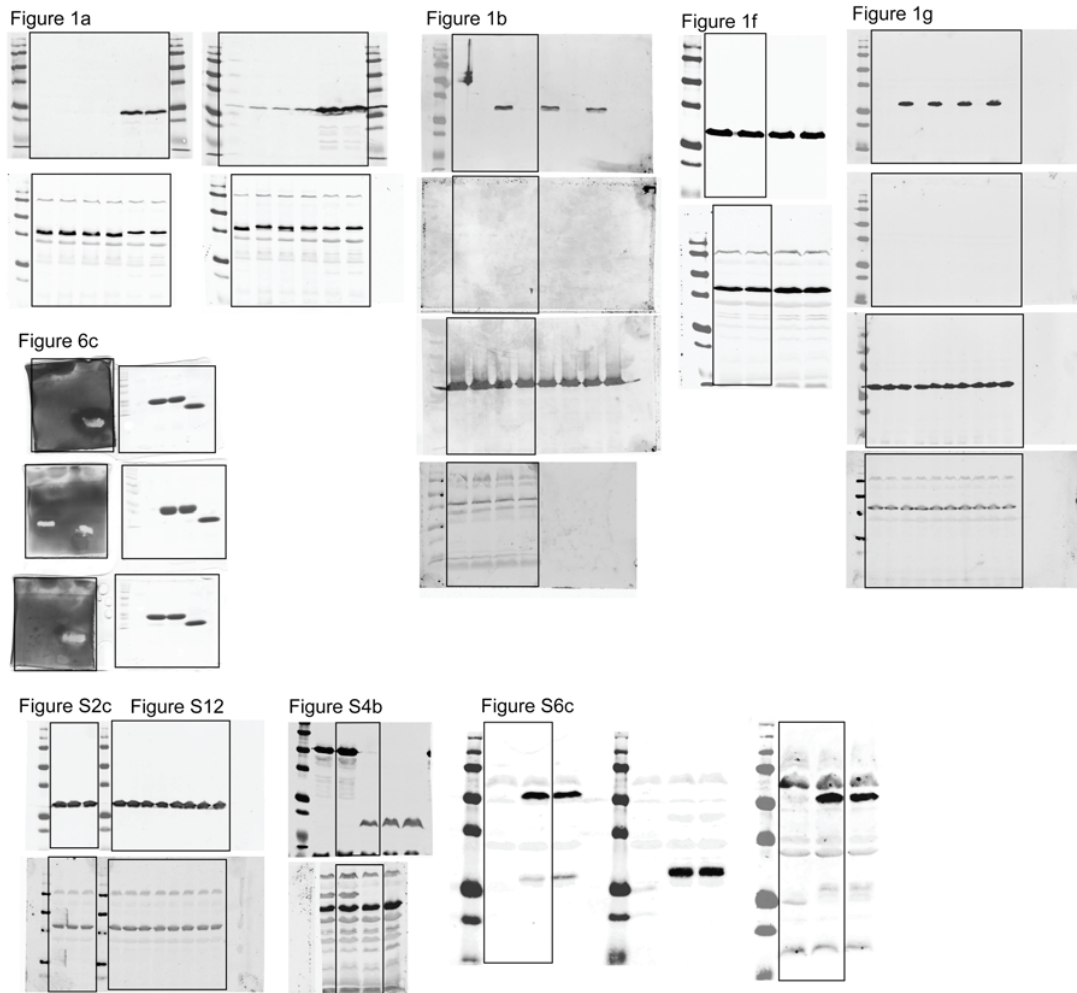

**Supplementary Fig. S15.** Uncropped blots shown in the different figures as indicated.

Supplement: NIHMS1064369-supplement-S15.pdf [file NIHMS1064369-supplement-S15.pdf]
